# Supplementary material for: Environmentally relevant UV-light weathering of polystyrene micro- and nanoplastics promotes hepatotoxicity in a human cell line
Source: Royal Society of Chemistry journal article supplement (doi:10.1039/d3en00044c), 2023-01-01
Supplement: d3en00044c1.pdf [file d3en00044c1.pdf]

## Supplementary Information

### Environmentally relevant UV-light weathering of polystyrene micro- and nanoplastics promotes hepatotoxicity in a human cell line

**Felix H. Englert<sup>a,b</sup>, Fabrice A. Mueller<sup>b</sup>, Battuja Dugershaw-Kurzer<sup>c</sup>, Vera M. Kissling<sup>c</sup>, Sarah Boentges<sup>c</sup>, Govind S. Gupta<sup>c</sup>, Gabriele A. Fontana<sup>b</sup>, Sabine Diedrich<sup>b</sup>, Laura Suter-Dick<sup>d,e</sup>, Shana J. Sturla<sup>b</sup>, Tina Buerki-Thurnherr<sup>c</sup>**

<sup>a</sup> University of Heidelberg, Faculty of Medicine, Heidelberg, Germany

<sup>b</sup> ETH Zurich, Department of Health Sciences and Technology, Laboratory of Toxicology, Zurich, Switzerland

<sup>c</sup> Empa Swiss Federal Laboratories for Materials Science and Technology, Particles-Biology Interactions, St. Gallen, Switzerland

<sup>d</sup> School of Life Sciences, University of Applied Sciences and Arts Northwestern Switzerland, 4132, Muttenz, Switzerland

<sup>e</sup> Swiss Centre for Applied Human Toxicology (SCAHT), 4001, Basel, Switzerland

\* corresponding author: [tina.buerki@empa.ch](mailto:tina.buerki@empa.ch)

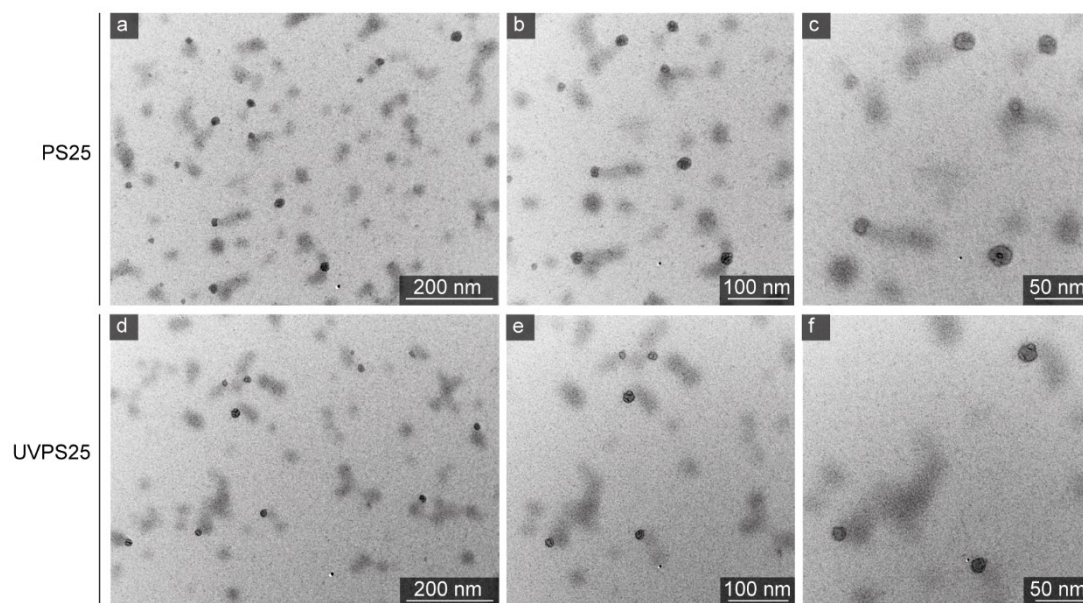

**Fig. S1: Effects of UV exposure on the morphology of PS25 particles.** Representative TEM images of 25 nm PS particles before (a and magnifications b,c) and after simulation of 2 months of sunlight exposure (d and magnifications e,f). No major morphological differences were apparent between PS25 and UVPS25.

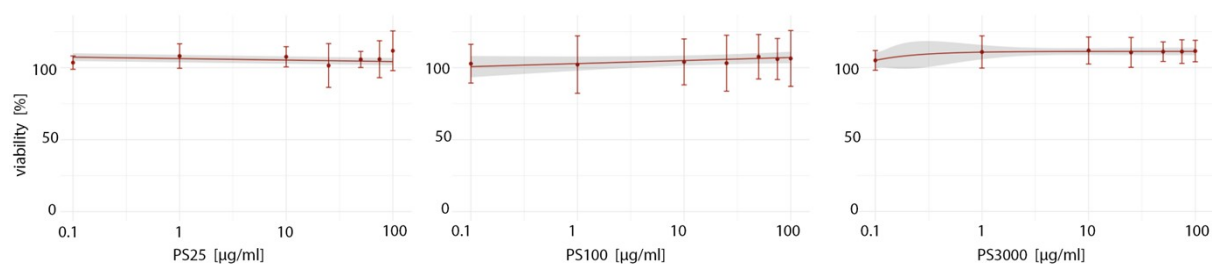

**Fig. S2: Impact of primary PS particles on viability of HepaRG cells upon prolonged exposure.** HepaRG cells were exposed to primary PS particles of 25 nm, 100 nm and 3000 nm for 10 days and viability was assessed by CellTiter-Glo® Luminescent Cell Viability assay. Solid red line represents mean values and 95% confidence intervals of the non-linear regression are shown in grey. Data represent mean  $\pm$  Stdev from three independent experiments with six technical replicates each. Values were normalized to untreated cells, which were defined as viability of 100%.

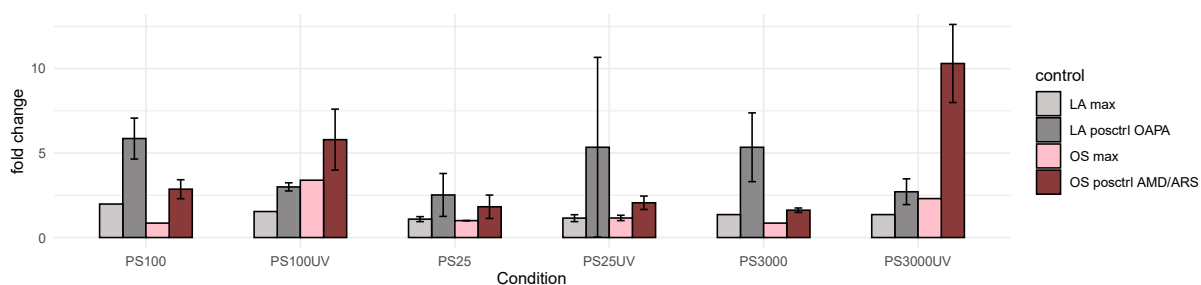

**Fig. S3: Positive controls for high content imaging.** Amiodarone (AMD) or arsenite (ARS) and oleic and palmitic acids (OAPA) were used as positive controls for oxidative stress (OS) and lipid accumulation (LA) in our high content imaging, respectively. Medium effects  $\pm$  Stdev of positive controls of three independent experiments are shown next to maximum effects seen in experimental conditions. Plates that underwent imaging but did not show induction of OS or LA in their positive control conditions were excluded.

**Suppl. Table 1: Primers used in this study**

| Primers for qPCR-based analysis of gene level expression on cDNA |                           |                    |                        |
|------------------------------------------------------------------|---------------------------|--------------------|------------------------|
| Human gene and directionality                                    | Sequence (5' - 3')        | Respective Protein | Source                 |
| AHR <i>FW</i>                                                    | GTAAGTCTCCCTTCATACC       | AhR                | Moriguchi et al., 2003 |
| AHR <i>REV</i>                                                   | AGGCACGAATTGGTTAGAG       |                    |                        |
| NR1I2 <i>FW</i>                                                  | TGCGAGATCACCCGGAAGAC      | PXR                | Takagi et al., 2008    |
| NR1I2 <i>REV</i>                                                 | ATGGGAGAAGGTAGTGCAAAGG    |                    |                        |
| NR1H3 <i>FW</i>                                                  | AGCTCAAGGATCTGGTGGTG      | LXR $\alpha$       | This study             |
| NR1H3 <i>REV</i>                                                 | GACAGCAGTGCAGACTTA        |                    |                        |
| SREBF1 <i>FW</i>                                                 | GGCTCCTGCCTACAGCTTCT      | SREBP1c            | Higuchi et al., 2008   |
| SREBF1 <i>REV</i>                                                | CAGCCAGTGGATCACCACA       |                    |                        |
| PPARA <i>FW</i>                                                  | ACTTATCCTGTGGTCCCGG       | PPAR $\alpha$      | Liu et al., 2004       |
| PPARA <i>REV</i>                                                 | CCGACAGAAAGGCACTTGTGA     |                    |                        |
| IL6 <i>FW</i>                                                    | GCTGCAGGCACAGAACCA        | IL-6               | Forte et al., 2016     |
| IL6 <i>REV</i>                                                   | GCTGCGCAGAATGAGATGAG      |                    |                        |
| CXCL8 <i>FW</i>                                                  | CTGGCCGTGGCTCTCTTG        | IL-8               | Forte et al., 2016     |
| CXCL8 <i>REV</i>                                                 | CTTGGCAAAACCTGCACCTTCA    |                    |                        |
| CRP <i>FW</i>                                                    | GAAC TTCAGCCGAATACATCTTTT | CRP                | Najar et al., 2012     |
| CRP <i>REV</i>                                                   | CTTGGCAAAACCTGCACCTTCA    |                    |                        |
| IL1B <i>FW</i>                                                   | ACGATGCACCTGTACGATCACT    | IL-1 $\beta$       | Forte et al., 2016     |
| IL1B <i>REV</i>                                                  | CACCAAGCTTTTTTGTGTGAGT    |                    |                        |
| TP53 <i>FW</i>                                                   | TCTGTCCCTTCCCAGAAAACC     | p53                | Forte et al., 2016     |
| TP53 <i>REV</i>                                                  | CAAGAAGCCCAGACGGAAAC      |                    |                        |
| MYC <i>FW</i>                                                    | AGGGTCAAGTTGGACAGTGTC     | c-Myc              | Forte et al., 2016     |
| MYC <i>REV</i>                                                   | TGGTGCATTTTCGGTTGTTG      |                    |                        |

**Suppl. Table 2: Raw mean Ct values for qPCR analysis**

| Gene             | PS25    |       | UVPS25  |       | PS100   |       | UVPS100 |       | Untreated |       |
|------------------|---------|-------|---------|-------|---------|-------|---------|-------|-----------|-------|
|                  | mean Ct | stdev | mean Ct   | stdev |
| <b>Ahr</b>       | 25.419  | 1.458 | 27.229  | 0.271 | 24.596  | 0.363 | 26.120  | 0.806 | 24.580    | 1.315 |
| <b>PXR</b>       | 28.177  | 3.196 | 30.857  | 2.806 | 28.245  | 2.967 | 28.661  | 2.664 | 30.870    | 1.307 |
| <b>LXRalpha</b>  | 26.226  | 2.175 | 29.657  | 2.127 | 28.313  | 3.197 | 28.400  | 2.473 | 28.513    | 1.135 |
| <b>SREBP1c</b>   | 23.849  | 1.146 | 26.704  | 0.561 | 25.614  | 1.386 | 26.043  | 0.426 | 24.581    | 0.478 |
| <b>PPARalpha</b> | 26.827  | 0.904 | 31.596  | 4.056 | 29.426  | 1.965 | 28.945  | 0.269 | 27.164    | 0.674 |
| <b>Il6</b>       | 30.547  | 2.997 | 34.394  | 1.998 | 32.748  | 0.576 | 31.635  | 2.720 | 31.154    | 1.039 |
| <b>Il8</b>       | 28.002  | 1.040 | 30.613  | 3.384 | 29.043  | 2.042 | 27.416  | 0.194 | 26.708    | 0.713 |
| <b>CRP</b>       | 27.964  | 0.759 | 32.158  | 3.673 | 29.187  | 1.826 | 28.389  | 0.719 | 26.130    | 1.071 |
| <b>IL1beta</b>   | 27.306  | 1.027 | 26.247  | 2.360 | 27.605  | 0.315 | 27.684  | 0.916 | 25.301    | 0.922 |
| <b>TP53</b>      | 26.889  | 1.578 | 27.753  | 3.788 | 35.746  | 8.843 | 29.028  | 0.185 | 27.156    | 1.346 |
| <b>C-myc</b>     | 27.475  | 1.942 | 26.177  | 2.972 | 28.954  | 0.946 | 28.122  | 0.715 | 24.749    | 0.960 |
| <b>GAPDH</b>     | 26.888  | 0.704 | 20.967  | 0.743 | 26.343  | 2.046 | 26.326  | 2.050 | 21.115    | 0.536 |

|                  | PS3000  |       | UVPS3000 |       | Untreated |       |
|------------------|---------|-------|----------|-------|-----------|-------|
|                  | mean Ct | stdev | mean Ct  | stdev | mean Ct   | stdev |
| <b>Ahr</b>       | 27.926  | 0.638 | 28.463   | 0.776 | 27.982    | 2.254 |
| <b>PXR</b>       | 32.101  | 0.294 | 32.490   | 1.011 | 29.949    | 0.895 |
| <b>LXRalpha</b>  | 31.028  | 1.008 | 30.571   | 0.523 | 30.311    | 0.311 |
| <b>SREBP1c</b>   | 28.546  | 0.574 | 29.121   | 0.385 | 28.356    | 0.441 |
| <b>PPARalpha</b> | 29.871  | 0.594 | 30.297   | 0.266 | 29.799    | 0.360 |
| <b>Il6</b>       | 34.574  | 0.316 | 35.199   | 0.273 | 33.658    | 0.485 |
| <b>Il8</b>       | 31.180  | 0.054 | 31.806   | 0.535 | 30.676    | 0.177 |
| <b>CRP</b>       | 28.577  | 1.046 | 29.407   | 1.143 | 29.052    | 0.809 |
| <b>IL1beta</b>   | 27.090  | 0.472 | 27.107   | 0.356 | 22.837    | 0.185 |
| <b>TP53</b>      | 31.252  | 0.310 | 31.207   | 0.276 | 30.617    | 0.477 |
| <b>C-myc</b>     | 29.776  | 0.474 | 29.743   | 0.249 | 26.908    | 0.026 |
| <b>GAPDH</b>     | 24.564  | 0.405 | 24.629   | 0.336 | 24.134    | 0.424 |
